# Supplementary material for: Ion-induced diversity in structure and magnetic properties of hexacyanometalate–lanthanide bimetallic assemblies
Source: Royal Society of Chemistry journal article supplement (doi:10.1039/c3ce41704b), 2013-01-01
Supplement: c3ce41704b.pdf [file c3ce41704b.pdf]

## Supplementary Information

### Ion-induced diversity in structure and magnetic properties of hexacyanometalate-lanthanide bimetallic assemblies

Mohd. Muddassir, Xiao-Jiao Song, Ying Chen, Fan Cao, Rong-Min Wei, You Song\*

**Table S1.** Selected bond lengths (Å) and angles (°) for **2** and **4**.

| <b>2</b>             |             | <b>4</b>   |             |
|----------------------|-------------|------------|-------------|
| Dy1—O1               | 2.294 (5)   | Ho1—O1     | 2.358 (3)   |
| Dy1—O2               | 2.279 (4)   | Ho1—O2     | 2.325 (3)   |
| Dy1—O3               | 2.323 (4)   | Ho1—O3     | 2.322 (3)   |
| Dy1—N1               | 2.448 (5)   | Ho1—N4     | 2.394 (4)   |
| Dy1—N2               | 2.497 (5)   | Ho1—N9i    | 2.438 (4)   |
| Dy1—N3               | 2.524 (6)   | Ho1—N1     | 2.464 (4)   |
| Dy1—N4               | 2.445 (5)   | Ho1—N3     | 2.466 (4)   |
| Dy1—N5 <sup>i</sup>  | 2.400 (5)   | Ho1—N2     | 2.476 (4)   |
| N5—Dy1 <sup>ii</sup> | 2.400 (5)   | N9—Ho1i    | 2.438 (4)   |
| C16—Co1              | 1.868 (6)   | C16—Co1    | 1.879 (5)   |
| C17—Co1              | 1.892 (7)   | C17—Co1    | 1.910 (5)   |
| C18—Co1              | 1.903 (6)   | C18—Co1    | 1.896 (5)   |
| C19—Co1              | 1.863 (7)   | C19—Co1    | 1.889 (5)   |
| C20—Co1              | 1.893 (7)   | C20—Co1    | 1.877 (5)   |
| C21—Co1              | 1.886 (7)   | C21—Co1    | 1.917 (5)   |
| O2—Dy1—O1            | 82.38 (19)  | O3—Ho1—O2  | 70.87 (12)  |
| O2—Dy1—O3            | 91.52 (17)  | O3—Ho1—O1  | 144.49 (12) |
| O1—Dy1—O3            | 143.42 (18) | O2—Ho1—O1  | 144.18 (11) |
| O2—Dy1—N5i           | 90.92 (17)  | O3—Ho1—N4  | 77.80 (13)  |
| O1—Dy1—N5i           | 71.79 (18)  | O2—Ho1—N4  | 103.89 (13) |
| O3—Dy1—N5i           | 144.63 (17) | O1—Ho1—N4  | 85.06 (14)  |
| O2—Dy1—N4            | 78.65 (16)  | O3—Ho1—N9i | 74.57 (12)  |
| O1—Dy1—N4            | 73.96 (18)  | O2—Ho1—N9i | 143.36 (12) |
| O3—Dy1—N4            | 69.48 (15)  | O1—Ho1—N9i | 71.94 (12)  |
| N5i—Dy1—N4           | 145.22 (17) | N4—Ho1—N9i | 79.94 (13)  |
| O2—Dy1—N1            | 151.66 (18) | O3—Ho1—N1  | 128.32 (12) |
| O1—Dy1—N1            | 77.29 (19)  | O2—Ho1—N1  | 70.06 (12)  |
| O3—Dy1—N1            | 93.15 (17)  | O1—Ho1—N1  | 77.68 (12)  |
| N5i—Dy1—N1           | 101.10 (17) | N4—Ho1—N1  | 80.16 (14)  |
| N4—Dy1—N1            | 76.90 (17)  | N9i—Ho1—N1 | 144.81 (14) |
| O2—Dy1—N2            | 140.78 (18) | O3—Ho1—N3  | 81.97 (13)  |
| O1—Dy1—N2            | 129.04 (18) | O2—Ho1—N3  | 89.65 (13)  |
| O3—Dy1—N2            | 75.66 (16)  | O1—Ho1—N3  | 99.47 (13)  |
| N5i—Dy1—N2           | 80.34 (17)  | N4—Ho1—N3  | 150.21 (13) |
| N4—Dy1—N2            | 127.64 (16) | N9i—Ho1—N3 | 73.70 (13)  |

|                          |             |             |             |
|--------------------------|-------------|-------------|-------------|
| N1—Dy1—N2                | 67.18 (19)  | N1—Ho1—N3   | 129.62 (14) |
| O2—Dy1—N3                | 76.45 (19)  | O3—Ho1—N2   | 135.84 (13) |
| O1—Dy1—N3                | 136.65 (19) | O2—Ho1—N2   | 79.99 (12)  |
| O3—Dy1—N3                | 75.13 (17)  | O1—Ho1—N2   | 72.94 (12)  |
| N5i—Dy1—N3               | 71.20 (17)  | N4—Ho1—N2   | 142.75 (13) |
| N4—Dy1—N3                | 135.67 (18) | N9i—Ho1—N2  | 119.08 (13) |
| N1—Dy1—N3                | 131.7 (2)   | N1—Ho1—N2   | 66.20 (13)  |
| N2—Dy1—N3                | 64.5 (2)    | N3—Ho1—N2   | 65.07 (13)  |
| C1—N1—Dy1                | 123.6 (5)   | C1—N1—Ho1   | 122.2 (3)   |
| C5—N1—Dy1                | 118.5 (5)   | C5—N1—Ho1   | 119.4 (3)   |
| C11—N3—Dy1               | 120.3 (5)   | C6—N2—Ho1   | 120.1 (3)   |
| C6—N2—Dy1                | 120.0 (5)   | C10—N2—Ho1  | 118.7 (3)   |
| C10—N2—Dy1               | 121.7 (5)   | C15—N3—Ho1  | 122.2 (3)   |
| C19—N4—Dy1               | 164.7 (5)   | C11—N3—Ho1  | 120.3 (3)   |
| C16—N5—Dy1 <sup>ii</sup> | 158.6 (5)   | C16—N4—Ho1  | 163.0 (4)   |
| C25B—O1—Dy1              | 147.1 (12)  | C20—N9—Ho1  | 160.4 (4)   |
| C22—O2—Dy1               | 138.4 (5)   | C22—O3—Ho1  | 133.4 (3)   |
| C19—Co1—C16              | 93.9 (2)    | C19—Co1—C18 | 89.6 (2)    |
| C19—Co1—C21              | 88.1 (3)    | C20—Co1—C17 | 89.83 (19)  |
| C16—Co1—C21              | 91.4 (3)    | C16—Co1—C17 | 91.5 (2)    |
| C19—Co1—C17              | 176.4 (3)   | C19—Co1—C17 | 176.87 (19) |
| C16—Co1—C17              | 89.2 (2)    | C18—Co1—C17 | 88.6 (2)    |
| C21—Co1—C17              | 90.1 (3)    | C20—Co1—C21 | 176.5 (2)   |
| C19—Co1—C20              | 89.5 (3)    | C16—Co1—C21 | 87.49 (19)  |
| C16—Co1—C20              | 88.4 (2)    | C19—Co1—C21 | 90.08 (19)  |
| C21—Co1—C20              | 177.6 (3)   | C18—Co1—C21 | 91.1 (2)    |
| C17—Co1—C20              | 92.3 (3)    | C17—Co1—C21 | 92.49 (19)  |
| C19—Co1—C18              | 88.2 (2)    | N4—C16—Co1  | 177.4 (4)   |
| C16—Co1—C18              | 177.5 (3)   | N5—C17—Co1  | 178.8 (4)   |
| C21—Co1—C18              | 89.9 (3)    | N6—C18—Co1  | 178.2 (4)   |
| C17—Co1—C18              | 88.8 (3)    | N7—C19—Co1  | 176.0 (4)   |
| C20—Co1—C18              | 90.4 (3)    | N9—C20—Co1  | 178.1 (4)   |
| N5—C16—Co1               | 175.7 (6)   | N8—C21—Co1  | 176.6 (5)   |
| N6—C17—Co1               | 177.8 (6)   | C20—Co1—C16 | 89.88 (19)  |
| N7—C18—Co1               | 179.8 (7)   | C20—Co1—C19 | 87.68 (19)  |
| N4—C19—Co1               | 173.0 (5)   | C16—Co1—C19 | 90.44 (19)  |
| N9—C20—Co1               | 177.3 (6)   | C20—Co1—C18 | 91.51 (19)  |
| N8—C21—Co1               | 178.4 (6)   | C16—Co1—C18 | 178.61 (19) |

Symmetry codes: (i)  $x, -y+3/2, z-1/2$ ;

(ii)  $-x, -y+1, -z+2$ .

**Table S2.** Results of the SHAPE analysis for the Lanthenides in compounds **1-4**.

| Structure | (SAPR-8) <sup>a</sup> | (DD-8) <sup>a</sup> | (BTP-8) <sup>a</sup> |
|-----------|-----------------------|---------------------|----------------------|
| [Ln]      |                       |                     |                      |
| <b>1</b>  | 3.212788              | 1.369765            | 2.248511             |
| <b>2</b>  | 3.171696              | 1.329167            | 2.238741             |
| <b>3</b>  | 1.314185              | 1.701814            | 2.301209             |
| <b>4</b>  | 1.316390              | 1.678959            | 2.401612             |

<sup>a</sup>SAPR-8:  $D_{4d}$ , Square antiprism; DD-8:  $D_{2d}$ , Triangular dodecahedron; BTP-8:  $D_{3d}$ , Bicapped trigonal prism.

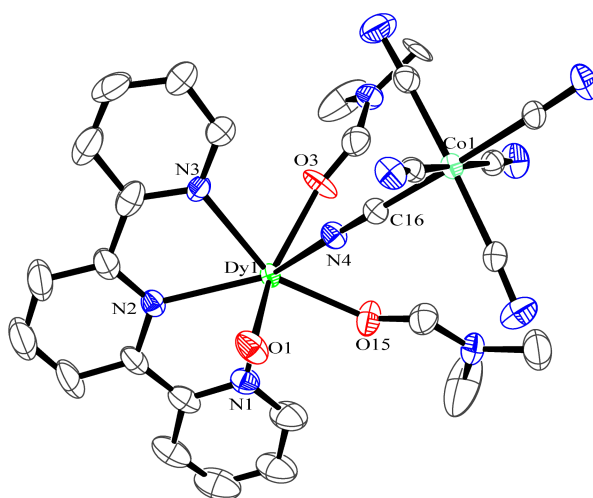

Fig. S1. ORTEP plot of **2** showing coordination environment of Dy<sup>III</sup> and Co<sup>III</sup> (thermal ellipsoids are drawn at the 30% probability level). H-atoms, disordered atoms, lattice water and methanol have been omitted for clarity.

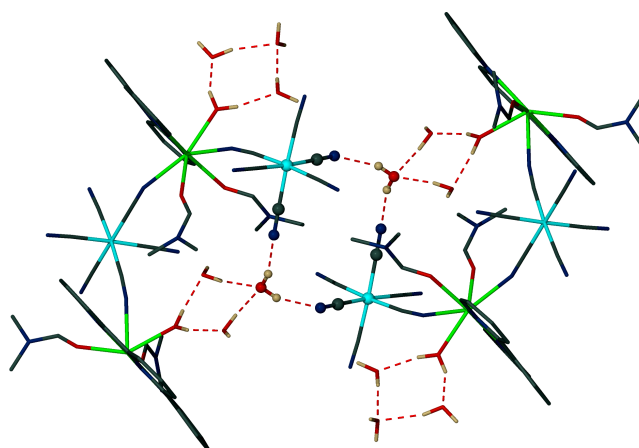

Fig. S2. Arrangement of 16-membered ring in **1** (projecting down  $b$ -axis) formed by O-H...N bonding between adjacent 1D chains generating a double buckled chain. Atoms involving in 16-membered ring are shown as spheres of arbitrary radii.

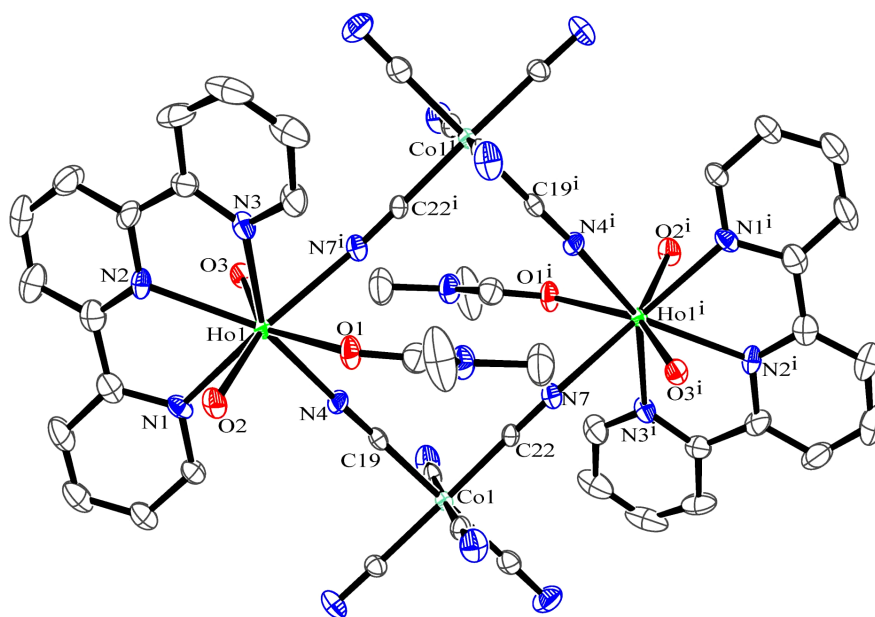

Fig. S3. The molecular structure of **4**, showing 30% probability ellipsoids displacement level H-atoms, disordered atoms and lattice water have been omitted for clarity.

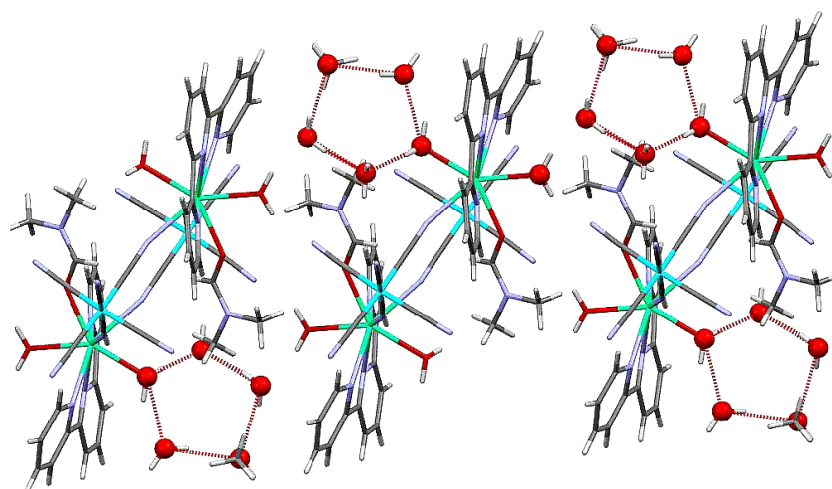

Fig. S4.1-D zigzag chain of **3** running parallel to *bc*-plane. O (red) of water and methanol atoms are shown as spheres of arbitrary radii.

**Table S3. Hydrogen bonds for complex 1–4.**

---

**Complex 1**

| Donor --- H...Acceptor | D...A    |
|------------------------|----------|
| O(4) --H(4A) ..O(3)    | 2.710(4) |
| O(5) --H(5B) ..O(3)    | 2.574(4) |
| O(6) --H(6A) ..O(4)    | 2.811(4) |
| O(6) --H(6B) ..O(5)    | 2.763(5) |
| O(5) --H(5B) ..N(6)    | 2.756(4) |
| O(6) --H(6A) ..N(9)    | 2.861(4) |
| O(6) --H(6B) ..N(7)    | 2.792(4) |

**Complex 2**

| Donor --- H...Acceptor | D...A    |
|------------------------|----------|
| O(4) --H(4A) ..O(3)    | 2.688(4) |
| O(5) --H(5B) ..O(3)    | 2.561(4) |
| O(6) --H(6A) ..O(4)    | 2.829(4) |
| O(6) --H(6B) ..O(5)    | 2.758(5) |
| O(5) --H(5B) ..N(6)    | 2.761(4) |
| O(6) --H(6A) ..N(9)    | 2.841(4) |
| O(6) --H(6B) ..N(7)    | 2.802(4) |

**Complex 3**

| Donor --- H...Acceptor | D...A    |
|------------------------|----------|
| O(2) --H(2A) ..O(4)    | 2.732(8) |
| O(4) --H(4B) .. O(6)   | 2.867(8) |
| O(4) --H(4B) .. O(8)   | 2.979(8) |
| O(8) --H(8A) .. O(5)   | 2.869(7) |
| O(5) --H(5A) .. O(1)   | 2.735(8) |
| O(5) --H(5B) ..N(8)    | 2.860(7) |
| O(2) --H(2B) ..N(7)    | 2.728(7) |

**Complex 4**

| Donor --- H...Acceptor | D...A    |
|------------------------|----------|
| O(2) --H(2A) ..O(4)    | 2.768(8) |
| O(4) --H(4B) .. O(6)   | 2.812(8) |
| O(4) --H(4B) .. O(7)   | 2.739(8) |
| O(7) --H(8A) .. O(5)   | 2.849(7) |
| O(5) --H(5A) .. O(1)   | 2.746(8) |
| O(5) --H(5B) ..N(8)    | 2.865(7) |
| O(2) --H(2B) ..N(7)    | 2.723(7) |

---

(a)

(b)

(c)

(d)

Fig. S5. FTIR spectra of complexes **1-4** (a-d).

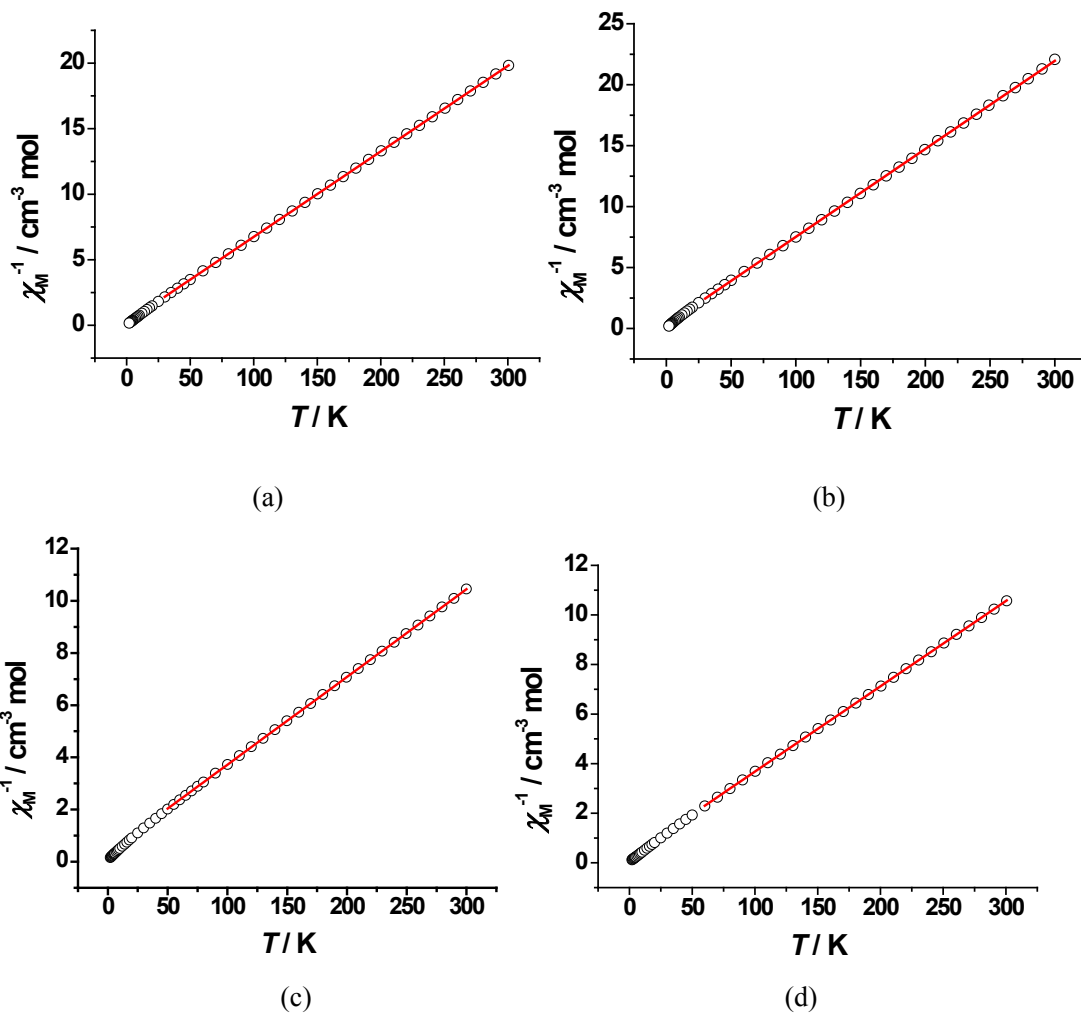

Fig. S6. Plot of  $\chi_M^{-1}$  vs  $T$  for complex 1-4 (a-d) at 0.1 kOe applied field with the linear fit shown as a red line.

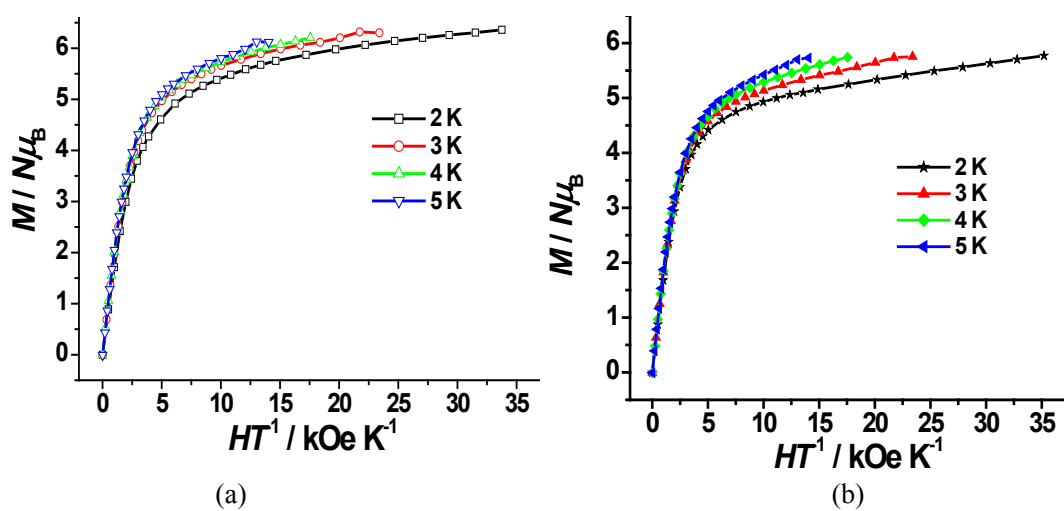

Fig. S7.  $M$  vs  $H/T$  plots at different temperatures 1(a) and 2(b).



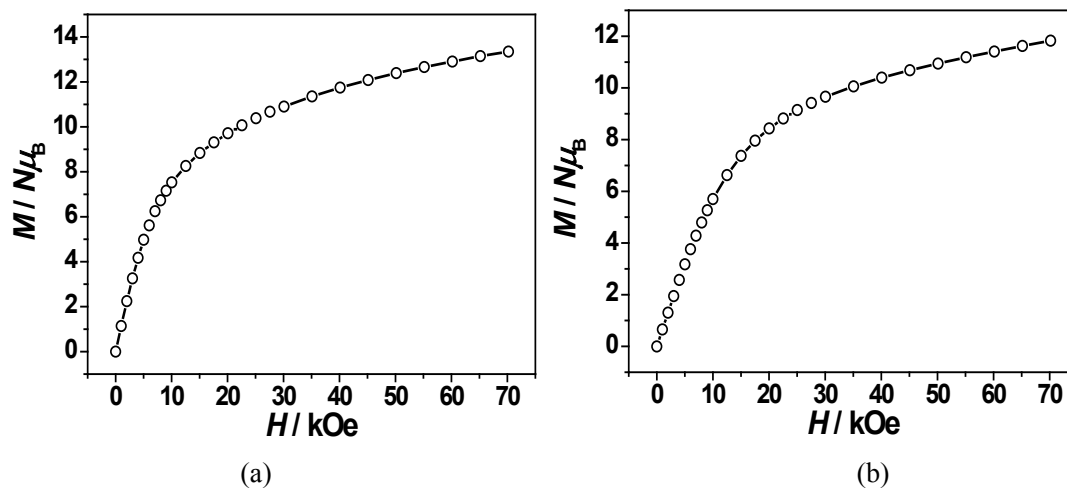

Fig. S8. The curve of field-dependent magnetization for **3(a)** and **4(b)** at K.

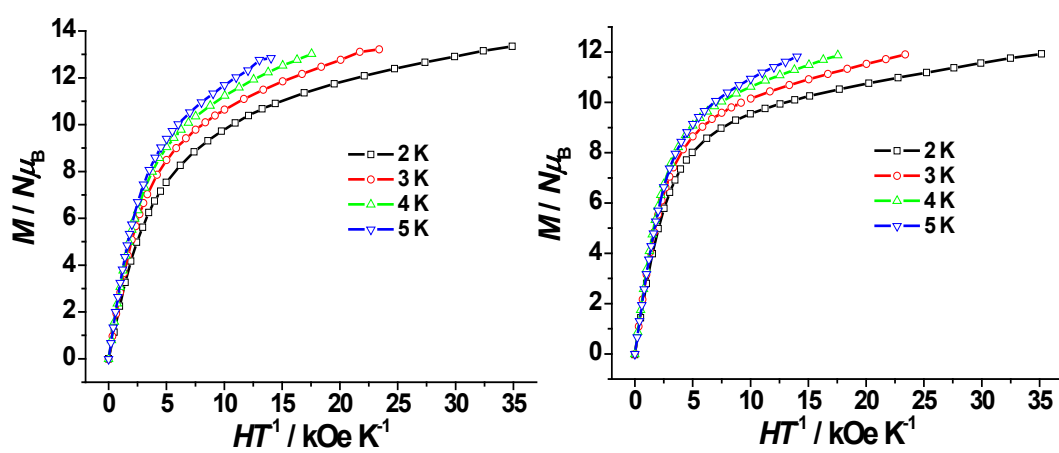

Fig. S9.  $M$  vs  $H/T$  plots at different temperatures **3(a)** and **4(b)**.

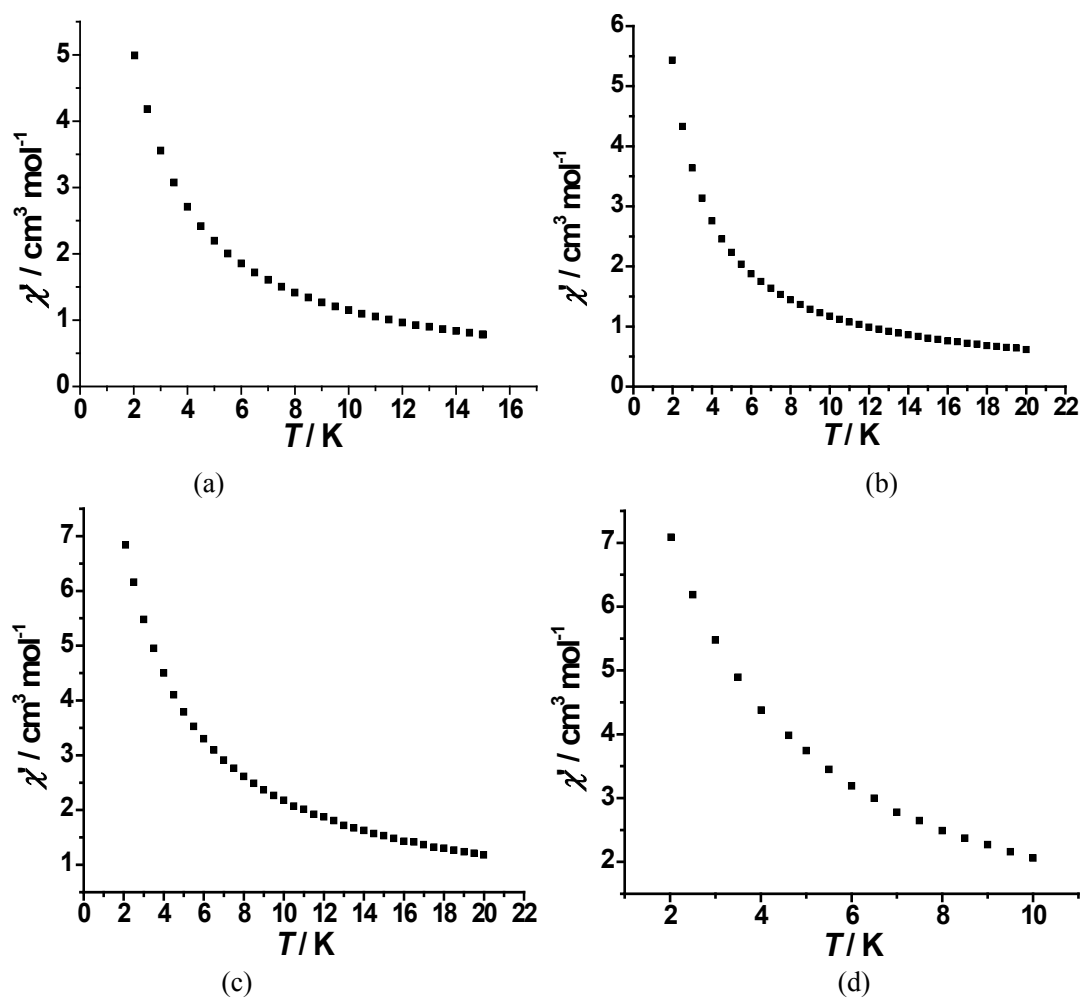

Fig. S10. Variable-temperature AC magnetic susceptibilities (in-phase) of complex 1-4 (a-d) in zero applied direct current field and an ac field of 5 Oe with a constant frequency of 997 Hz.

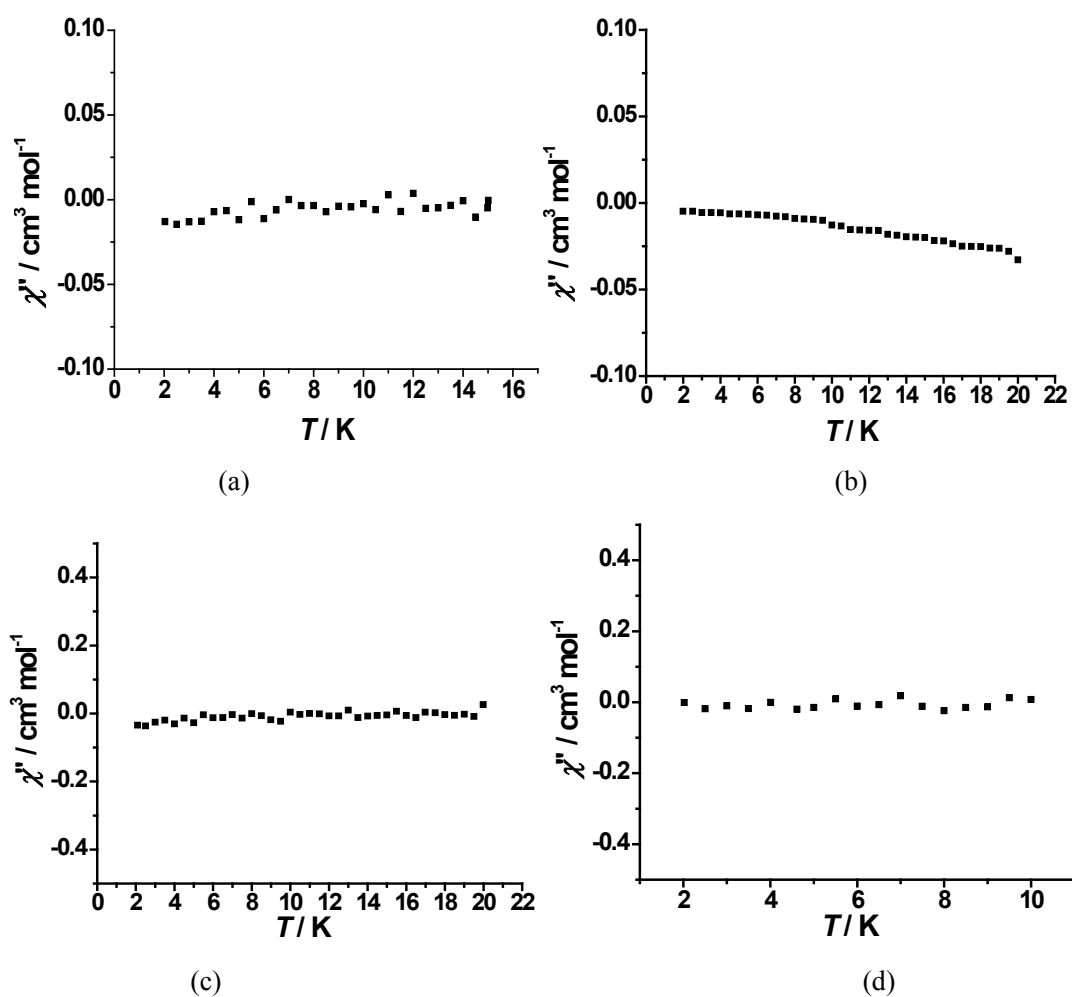

Fig. S11. Variable-temperature AC magnetic susceptibilities (out-of-phase) of complex 1-4 (a-d) in zero applied direct current field and an ac field of 5 Oe with a constant frequency of 997 Hz.

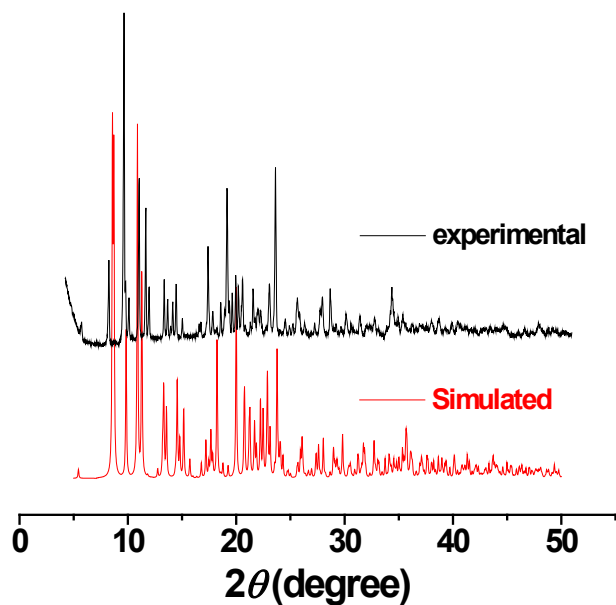

(a)

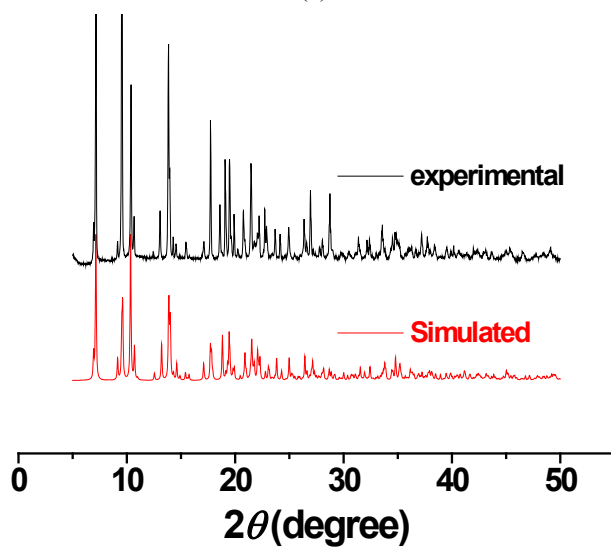

(b)

Fig. S12. Simulated (blue) and experimental (black) and powder XRD data for complex **1** and **3** (Because of isomorphous nature of complexes only complexes **1** and **3** were measured).
